# Supplementary material for: CBT for Prolonged Grief in Children and Adolescents: A Randomized Clinical Trial
Source: Atypon-hosted journal article supplement (doi:10.1176/appi.ajp.2020.20050548), 2021-01-21
Supplement: appi.ajp.2020.20050548.ds001.pdf [file appi.ajp.2020.20050548.ds001.pdf]

Data supplement for Boelen et al., CBT for Prolonged Grief in Children and Adolescents: A Randomized Clinical Trial. Am J Psychiatry (doi: 10.1176/appi.ajp.2020.20050548)

**Table S1.** Observed means (SD) for prolonged grief, depression, and posttraumatic stress disorder

|                | Prolonged grief        |                | Depression             |                | Posttraumatic stress disorder |                |
|----------------|------------------------|----------------|------------------------|----------------|-------------------------------|----------------|
|                | Supportive Counselling | CBT Grief-Help | Supportive Counselling | CBT Grief-Help | Supportive Counselling        | CBT Grief-Help |
| Pre-treatment  | 55.98 (11.17)          | 57.62 (9.97)   | 13.82 (8.41)           | 13.39 (6.90)   | 16.76 (10.14)                 | 17.52 (8.44)   |
| Post-treatment | 42.84 (10.28)          | 40.73 (7.94)   | 8.54 (5.02)            | 8.81 (5.47)    | 7.34 (7.07)                   | 6.73 (5.78)    |
| 3-months-FU    | 43.11 (10.38)          | 40.15 (7.95)   | 8.14 (5.67)            | 7.83 (5.02)    | 9.03 (6.78)                   | 7.70 (7.01)    |
| 6-months-FU    | 43.84 (12.72)          | 38.80 (8.06)   | 9.26 (7.72)            | 6.96 (5.16)    | 9.45 (9.40)                   | 7.00 (7.70)    |
| 12-months-FU   | 42.91 (13.30)          | 36.71 (6.90)   | 8.12 (7.44)            | 5.34 (4.76)    | 8.40 (9.88)                   | 4.58 (5.13)    |

Note. CBT = Cognitive Behavioral Therapy. FU = follow-up.

**Table S2.** Observed means (SD) for posttraumatic stress disorder (PTSD) clusters of reexperiencing, avoidance, hyperarousal

|                | PTSD reexperiencing    |                | PTSD avoidance         |                | PTSD hyperarousal      |                |
|----------------|------------------------|----------------|------------------------|----------------|------------------------|----------------|
|                | Supportive Counselling | CBT Grief-Help | Supportive Counselling | CBT Grief-Help | Supportive Counselling | CBT Grief-Help |
| Pre-treatment  | 4.60 (3.67)            | 5.09 (3.33)    | 6.43 (4.04)            | 6.33 (3.81)    | 5.78 (3.70)            | 6.11 (3.25)    |
| Post-treatment | 2.02 (2.41)            | 1.69 (1.97)    | 2.49 (2.96)            | 2.21 (2.36)    | 2.83 (2.56)            | 2.82 (2.39)    |
| 3-months-FU    | 2.76 (2.61)            | 2.13 (2.50)    | 3.15 (3.66)            | 2.76 (3.06)    | 3.30 (2.61)            | 2.81 (2.54)    |
| 6-months-FU    | 3.00 (3.44)            | 1.95 (2.47)    | 2.84 (3.31)            | 2.66 (3.44)    | 3.29 (2.61)            | 2.39 (2.53)    |
| 12-months-FU   | 2.76 (3.77)            | 1.49 (2.13)    | 5.78 (3.70)            | 1.31 (1.81)    | 2.80 (3.48)            | 1.79 (1.98)    |

Note. CBT = Cognitive Behavioral Therapy. FU = follow-up.

**Table S3.** Observed means (SD) for internalizing, externalizing, and total problem behavior

|                | CBCL internalizing        |              | CBCL externalizing        |              | CBCL total problem behavior |               |
|----------------|---------------------------|--------------|---------------------------|--------------|-----------------------------|---------------|
|                | Supportive<br>Counselling | Grief-Help   | Supportive<br>Counselling | Grief-Help   | Supportive<br>Counselling   | Grief-Help    |
| Pre-treatment  | 14.60 (8.96)              | 15.38 (8.78) | 14.06 (8.73)              | 10.57 (8.42) | 51.51 (24.84)               | 45.11 (24.00) |
| Post-treatment | 10.69 (7.12)              | 9.74 (8.03)  | 9.57 (8.61)               | 8.86 (8.87)  | 36.55 (25.10)               | 33.24 (24.86) |
| 3-months-FU    | 9.32 (6.62)               | 6.81 (7.02)  | 8.82 (7.29)               | 6.08 (6.31)  | 32.02 (21.72)               | 22.36 (17.94) |
| 6-months-FU    | 10.14 (7.74)              | 5.81 (7.08)  | 9.40 (10.38)              | 4.12 (5.46)  | 33.87 (27.85)               | 16.88 (17.17) |
| 12-months-FU   | 8.58 (6.55)               | 4.34 (4.75)  | 5.64 (4.66)               | 3.87 (3.97)  | 24.70 (17.21)               | 15.04 (12.92) |

Note. CBCL = Child Behavior Checklist. CBT = Cognitive Behavioral Therapy. FU = follow-up.

**Table S4.** Parameter estimates for posttraumatic stress disorder (PTSD) clusters for intention-to-treat sample (N=134) including baseline depression as covariate

|                                              | PTSD reexperiencing |      |         | PTSD avoidance |      |         | PTSD hyperarousal |      |         |
|----------------------------------------------|---------------------|------|---------|----------------|------|---------|-------------------|------|---------|
|                                              | B                   | SE   | p-value | B              | SE   | p-value | B                 | SE   | p-value |
| Intercept                                    | 2.29                | 0.83 | 0.006   | 3.96           | 0.90 | <0.001  | 2.81              | 0.79 | <0.001  |
| Baseline depression                          | 0.12                | 0.02 | <0.001  | 0.18           | 0.02 | <0.001  | 0.19              | 0.02 | <0.001  |
| Pre-treatment vs. post-treatment             | -1.48               | 0.90 | 0.101   | -3.48          | 1.05 | 0.001   | -1.94             | 0.93 | 0.038   |
| Pre-treatment vs. 3-months-FU                | -0.40               | 0.98 | 0.681   | -2.94          | 1.14 | 0.010   | -1.10             | 1.01 | 0.279   |
| Pre-treatment vs. 6-months-FU                | 0.40                | 1.04 | 0.698   | -2.34          | 1.21 | 0.053   | -0.66             | 1.07 | 0.537   |
| Pre-treatment vs. 12-months-FU               | 0.26                | 1.12 | 0.818   | -2.07          | 1.30 | 0.112   | -0.87             | 1.15 | 0.450   |
| Condition                                    | 0.58                | 0.47 | 0.216   | -0.02          | 0.51 | 0.961   | 0.41              | 0.45 | 0.358   |
| Pre-treatment vs. post-treatment * Condition | -0.95               | 0.54 | 0.081   | -0.33          | 0.63 | 0.602   | -0.66             | 0.56 | 0.236   |
| Pre-treatment vs. 3-months-FU * Condition    | -1.21               | 0.59 | 0.041   | -0.27          | 0.69 | 0.710   | -0.96             | 0.61 | 0.115   |
| Pre-treatment vs. 6-months-FU * Condition    | -1.69               | 0.61 | 0.006   | -0.55          | 0.71 | 0.442   | -1.37             | 0.63 | 0.030   |

|                                                |       |      |       |       |      |       |       |      |       |
|------------------------------------------------|-------|------|-------|-------|------|-------|-------|------|-------|
| Pre-treatment vs. 12-<br>months-FU * Condition | -1.86 | 0.66 | 0.005 | -1.35 | 0.77 | 0.079 | -1.54 | 0.68 | 0.023 |
|------------------------------------------------|-------|------|-------|-------|------|-------|-------|------|-------|

Note. FU = follow-up.

**Table S5.** Parameter estimates for prolonged grief levels for intention-to-treat sample (N=134) including gender as moderator

|                                                       | Prolonged grief |      |         |
|-------------------------------------------------------|-----------------|------|---------|
|                                                       | B               | SE   | p-value |
| Intercept                                             | 46.99           | 2.88 | <0.001  |
| Baseline depression                                   | 0.53            | 0.09 | <0.001  |
| Pre-treatment vs. post-treatment                      | -7.93           | 2.78 | 0.005   |
| Pre-treatment vs. 3-months-FU                         | -6.87           | 3.04 | 0.025   |
| Pre-treatment vs. 6-months-FU                         | -3.64           | 3.20 | 0.257   |
| Pre-treatment vs. 12-months-FU                        | -4.27           | 3.45 | 0.217   |
| Condition                                             | 1.89            | 1.57 | 0.231   |
| Gender                                                | -0.41           | 1.54 | 0.792   |
| Pre-treatment vs. post-treatment * Condition          | -4.94           | 1.77 | 0.006   |
| Pre-treatment vs. 3-months-FU * Condition             | -4.49           | 1.96 | 0.023   |
| Pre-treatment vs. 6-months-FU * Condition             | -6.78           | 2.01 | 0.001   |
| Pre-treatment vs. 12-months-FU * Condition            | -7.97           | 2.14 | <0.001  |
| Pre-treatment vs. post-treatment * Condition * Gender | 0.94            | 0.97 | 0.333   |
| Pre-treatment vs. 3-months-FU * Condition * Gender    | -0.35           | 1.07 | 0.742   |
| Pre-treatment vs. 6-months-FU * Condition * Gender    | -0.32           | 1.06 | 0.768   |
| Pre-treatment vs. 12-months-FU * Condition * Gender   | 0.54            | 1.13 | 0.633   |

Note. FU = follow-up. Gender was coded 0 = boy, 1 = girl

**Table S6.** Parameter estimates for prolonged grief levels for intention-to-treat sample (N=134) including age (in years) as moderator

|                                                    | Prolonged grief |      |         |
|----------------------------------------------------|-----------------|------|---------|
|                                                    | B               | SE   | p-value |
| Intercept                                          | 54.94           | 4.32 | <0.001  |
| Baseline depression                                | 0.53            | 0.09 | <0.001  |
| Pre-treatment vs. post-treatment                   | -8.30           | 2.79 | 0.003   |
| Pre-treatment vs. 3-months-FU                      | -6.29           | 3.03 | 0.039   |
| Pre-treatment vs. 6-months-FU                      | -3.50           | 3.20 | 0.274   |
| Pre-treatment vs. 12-months-FU                     | -4.36           | 3.45 | 0.207   |
| Condition                                          | 2.19            | 1.54 | 0.157   |
| Age                                                | -0.67           | 0.27 | 0.013   |
| Pre-treatment vs. post-treatment * Condition       | -8.92           | 2.81 | 0.002   |
| Pre-treatment vs. 3-months-FU * Condition          | -11.35          | 3.20 | <0.001  |
| Pre-treatment vs. 6-months-FU * Condition          | -10.83          | 3.22 | 0.001   |
| Pre-treatment vs. 12-months-FU * Condition         | -10.84          | 3.43 | 0.002   |
| Pre-treatment vs. post-treatment * Condition * Age | 0.36            | 0.17 | 0.039   |
| Pre-treatment vs. 3-months-FU * Condition * Age    | 0.48            | 0.19 | 0.012   |
| Pre-treatment vs. 6-months-FU * Condition * Age    | 0.29            | 0.19 | 0.134   |
| Pre-treatment vs. 12-months-FU * Condition * Age   | 0.24            | 0.21 | 0.240   |

Note. FU = follow-up.

**Table S7.** Parameter estimates for prolonged grief levels for intention-to-treat sample (N=134) including time since loss (in months) as moderator

|                                                                | Prolonged grief |      |         |
|----------------------------------------------------------------|-----------------|------|---------|
|                                                                | B               | SE   | p-value |
| Intercept                                                      | 47.57           | 3.08 | <0.001  |
| Baseline depression                                            | 0.52            | 0.09 | <0.001  |
| Pre-treatment vs. post-treatment                               | -7.75           | 2.79 | 0.006   |
| Pre-treatment vs. 3-months-FU                                  | -6.62           | 3.04 | 0.030   |
| Pre-treatment vs. 6-months-FU                                  | -3.48           | 3.22 | 0.279   |
| Pre-treatment vs. 12-months-FU                                 | -4.23           | 3.46 | 0.222   |
| Condition                                                      | 1.74            | 1.58 | 0.270   |
| Time since loss                                                | -0.01           | 0.02 | 0.602   |
| Pre-treatment vs. post-treatment * Condition                   | -3.90           | 1.70 | 0.023   |
| Pre-treatment vs. 3-months-FU * Condition                      | -4.54           | 1.87 | 0.016   |
| Pre-treatment vs. 6-months-FU * Condition                      | -6.90           | 1.92 | <0.001  |
| Pre-treatment vs. 12-months-FU * Condition                     | -7.57           | 2.07 | <0.001  |
| Pre-treatment vs. post-treatment * Condition * Time since loss | -0.02           | 0.01 | 0.187   |
| Pre-treatment vs. 3-months-FU * Condition * Time since loss    | -0.01           | 0.02 | 0.585   |
| Pre-treatment vs. 6-months-FU * Condition * Time since loss    | <-0.01          | 0.01 | 0.781   |
| Pre-treatment vs. 12-months-FU * Condition * Time since loss   | <-0.01          | 0.02 | 0.794   |

Note. FU = follow-up.



**Table S8.** Parameter estimates for prolonged grief levels for intention-to-treat sample (N=134) including kinship to the deceased as moderator

|                                                        | Prolonged grief |      |         |
|--------------------------------------------------------|-----------------|------|---------|
|                                                        | B               | SE   | p-value |
| Intercept                                              | 48.84           | 2.99 | <0.001  |
| Baseline depression                                    | 0.54            | 0.08 | <0.001  |
| Pre-treatment vs. post-treatment                       | -7.91           | 2.72 | 0.004   |
| Pre-treatment vs. 3-months-FU                          | -6.06           | 2.97 | 0.042   |
| Pre-treatment vs. 6-months-FU                          | -3.34           | 3.13 | 0.287   |
| Pre-treatment vs. 12-months-FU                         | -4.56           | 3.39 | 0.179   |
| Condition                                              | 2.02            | 1.54 | 0.193   |
| Kinship                                                | -3.34           | 1.66 | 0.045   |
| Pre-treatment vs. post-treatment * Condition           | -6.52           | 1.82 | <0.001  |
| Pre-treatment vs. 3-months-FU * Condition              | -8.35           | 2.07 | <0.001  |
| Pre-treatment vs. 6-months-FU * Condition              | -10.01          | 2.06 | <0.001  |
| Pre-treatment vs. 12-months-FU * Condition             | -11.28          | 2.15 | <0.001  |
| Pre-treatment vs. post-treatment * Condition * Kinship | 2.84            | 1.06 | 0.008   |
| Pre-treatment vs. 3-months-FU * Condition * Kinship    | 4.28            | 1.21 | <0.001  |
| Pre-treatment vs. 6-months-FU * Condition * Kinship    | 3.85            | 1.22 | 0.002   |
| Pre-treatment vs. 12-months-FU * Condition * Kinship   | 5.09            | 1.25 | <.001   |

Note. FU = follow-up. Kinship is coded 0 = deceased person is not the parent, 1 = deceased person is the parent.

**Table S9.** Parameter estimates for prolonged grief levels for intention-to-treat sample (N=134) including cause of death as moderator

|                                                      | Prolonged grief |      |         |
|------------------------------------------------------|-----------------|------|---------|
|                                                      | B               | SE   | p-value |
| Intercept                                            | 48.10           | 2.98 | <0.001  |
| Baseline depression                                  | 0.52            | 0.09 | <0.001  |
| Pre-treatment vs. post-treatment                     | -8.35           | 2.77 | 0.003   |
| Pre-treatment vs. 3-months-FU                        | -6.84           | 3.02 | 0.024   |
| Pre-treatment vs. 6-months-FU                        | -3.52           | 3.19 | 0.270   |
| Pre-treatment vs. 12-months-FU                       | -3.96           | 3.45 | 0.251   |
| Condition                                            | 1.67            | 1.57 | 0.289   |
| Cause                                                | -2.14           | 1.55 | 0.170   |
| Pre-treatment vs. post-treatment * Condition         | -4.88           | 1.69 | 0.004   |
| Pre-treatment vs. 3-months-FU * Condition            | -5.05           | 1.86 | 0.007   |
| Pre-treatment vs. 6-months-FU * Condition            | -7.06           | 1.91 | <0.001  |
| Pre-treatment vs. 12-months-FU * Condition           | -7.59           | 2.04 | <0.001  |
| Pre-treatment vs. post-treatment * Condition * Cause | 1.69            | 0.98 | 0.086   |
| Pre-treatment vs. 3-months-FU * Condition * Cause    | 0.90            | 1.07 | 0.401   |
| Pre-treatment vs. 6-months-FU * Condition * Cause    | 0.21            | 1.06 | 0.845   |
| Pre-treatment vs. 12-months-FU * Condition * Cause   | -0.55           | 1.14 | 0.633   |

Note. Cause of death is coded 0 = natural, 1 = unnatural. FU = follow-up.
